# Supplementary material for: Accelerating the Gillespie Exact Stochastic Simulation Algorithm Using Hybrid Parallel Execution on Graphics Processing Units
Source: PLOS journal article supplement (doi:10.1371/journal.pone.0046693), 2012-11-09
Supplement: S1 (10.1371/journal.pone.0046693.s001) [file journal.pone.0046693.s001]

# Supporting Information File S1

## Generating Random Consistent Synthetic Networks

To evaluate our algorithms we use random consistent synthetic networks. These synthetic networks can have reactions of the following type: The input to our network generator is the number of reactants

|                      |                                                                                                  |
|----------------------|--------------------------------------------------------------------------------------------------|
| Zero order           | $\phi \rightarrow S_i$                                                                           |
| First Order          | $S_i \rightarrow \phi$<br>$S_i \rightarrow 2S_k$<br>$S_i \rightarrow S_k + S_l$                  |
| Second Order         | $S_i + S_j \rightarrow \phi$<br>$S_i + S_j \rightarrow S_k$<br>$S_i + S_j \rightarrow S_k + S_l$ |
| Special Second Order | $2S_i \rightarrow \phi$<br>$2S_i \rightarrow S_k$<br>$2S_i \rightarrow S_k + S_l$                |

$N$ , and the number of each of the different types of reactions, and the require number of reactions  $M$ . We randomly select the reaction type (zero order, first order, second order, or special second order) and subtype to be generated at each step. Furthermore, we randomly select the reactants for a given reaction. We maintain a hash table of all reactions that are generated to make sure that reactions are not duplicated. The hash is basically a permutation of the two reactants and two product indices. For example, a second order reaction  $S_i + S_j \rightarrow S_k + S_l$ , will have the hash  $[i, j, k, l]$  which is the same as  $[i, j, l, k]$ ,  $[j, i, l, k]$ , and  $[j, i, k, l]$ . A first order reaction  $S_i \rightarrow S_k + S_l$  will have the hash  $[i, -1, k, l]$ , which is the same as  $[i, -1, l, k]$ ,  $[-1, i, l, k]$ , and  $[-1, i, k, l]$ . If there are less than 2 reactants or 2 products, then the corresponding index in the hash is set to  $-1$ . The reaction rates are randomly selected as  $k_r \leftarrow U[0, 1]$  for each reaction.
